# Supplementary material
Source: PubMed Central journal article supplement (PMC5717184)

## Supplementary Methods

**V<sub>H</sub>H panning strategies.** In the first round of pannings, 10 ug/mL of target antigen was coated onto a Nunc Immuntube, then blocked with a blocking solution (either 2% goat serum or 4% non-fat dried milk powder in PBS). The phage library was diluted 2-fold in blocking solution, then exposed to immobilized antigen for 1 hour. Unbound phages were washed away with 0.5% PBST, and the bound phages were eluted. Elution was carried out in two phases, first by adding an overnight growth of ER2738 *E. coli* (tetracycline resistant) for 15 minutes, and then secondarily by eluting remaining bound phages with a low pH glycine solution (pH 2.2) for 10 minutes. The glycine eluted phages were neutralized with Tris, combined with the ER2738 eluted phages and plated on SB-Agar-Ampicillin-Tetracycline-2% glucose plates to form a lawn. This lawn was grown overnight, then scraped and stored in 15% glycerol at -80C, to be used as input for the second round. To prepare the phage input for the second round, the same procedure as round 1 was repeated, where an aliquot of the Round 1 Elution was thawed and grown to log phase, then infected with helper phage. Phages were precipitated and prepared for screening as in round 1. In the second round, the antigen was coated on the immuntube at 1 ug/mL and blocked. The round 2 phage input was then diluted 200-fold in blocking solution, and binding to immobilized antigen was limited to 10 minutes before washing and elution. Eluted phages were serially 10-fold diluted and plated, and 95 individual *E. coli* colonies were chosen for further study, one in each well of a 96 well “master” plate (with one empty well as a negative growth control). Each well contained 200 uL SB media with ampicillin, tetracycline and 2% glucose. In some screens, two separate 96 well plates were chosen, resulting in 190 individual colonies. The remaining bulk of the second round elution was plated, and then scraped and stored at -80C.

To test chosen VHH colonies for binding to targets, a “soluble” plate was made. A few µL of each well of the master plate was transferred to a well of fresh media (160 uL SB ampicillin, tetracycline) in a new plate. The plate was grown to log phase, and then induced to express VHH-pIII fusion protein with 70 uL of 10 mM IPTG overnight (final concentration ~3 mM). Expressed VHH protein (with an epitopic E-tag situated between the VHH and pIII proteins) is targeted to the periplasm by a signal peptide, and some small amount leaks out of the bacterial outer membrane and into the supernatant. The next day the plate was spun down, and the supernatant was transferred to ELISA plates that had been coated with relevant antigens and then blocked. Binding was detected with anti-E tag antibody conjugated to HRP (Bethyl Labs),

developed with SureBlue TMB (KPL), and the absorbance was read at 450 nm on a VersaMax Microplate reader (Molecular Devices). The VHH coding regions of positive binding clones were then amplified by PCR, and DNA fingerprinted by digestion with two different restriction enzymes (BsaJI and BSTN1) to identify unique clones. All unique digestion patterns were then grown, minipreped and sequenced, and the VHHs with unique protein sequences were chosen for expression and characterization.

The nine different screening strategies were as follows:

**Screens 1 and 2:** Immunotubes were directly coated with RTA (1) or RTB (2). Two plates of colonies against each target were chosen. This resulted in 11 anti-RTA (JIV- and JIY-) and 9 anti-RTB (JIW- and JIZ-) VHHs.

**Screens 3 and 4:** Immunotubes were directly coated with RTA (3) or RTB (4). One plate of colonies against each target was chosen. This resulted in 7 anti-RTA (JNM-) and 9 anti-RTB (JNN-) VHHs.

**Screens 5 and 6:** Immunotubes were coated with either ASF (5) or PB10 (6), and then ricin was captured. One plate of colonies against each target was chosen, and only VHHs double positive for binding to both targets were kept. This resulted in 10 anti-RTA, 2 anti-RTB and 1 anti-holotoxin VHHs (V1 and V2).

**Screen 7:** Immunotubes were coated with avidin, and then biotin-tagged peptides E12 and G3 were captured. One plate of colonies was chosen. None of the chosen colonies recognized the peptides, RTA or ricin.

**Screen 8:** Immunotubes were coated with ASF, and then RTB was captured. One plate of colonies was chosen. This resulted in 5 anti-RTB VHHs (V4).

**Screen 9:** Immunotubes were coated with JIV-F5, and then ricin was captured. JIV-F6 was added into the supernatant in saturating concentrations. One plate of colonies was chosen. This resulted in 3 anti-RTA VHHs, 8 anti-RTB VHHs, and 3 anti-holotoxin VHHs (V5).

**VHH Nomenclature.** VHH nomenclature is based on an incremental naming scheme unique to the institute that identified the V<sub>H</sub>H. Screens 1-4 were performed at Tufts Cummings School of Veterinary Medicine, where each plate of colonies chosen after two rounds is given a three-letter code. Any VHH identified from that plate is named as the three-letter code, followed by the well that the VHH was grown in (i.e., JIV-F5 was from the plate named JIV, and well F5). Starting with screen 5, ricin panning was performed at the Wadsworth Center, where “VHH Phage Display Experiment 1” led to a plate of colonies named V1. Thus, V1B4 was from the “V1” plate, well B4, and so forth.

**VHH Cloning and Expression.** Once VHHs were sequenced and chosen for expression, the VHH coding insert was digested out of the phage display plasmid with AscI/NotI, run on and cut out of a gel, and Gene Cleaned (MP Biomedical, Santa Ana, CA). The insert was then added to a previously prepared linear expression plasmid (also cut with AscI/NotI, as well as an internal SpeI cut site) with Ampicillin resistance, a Thioredoxin expression partner for the VHH, and a C-terminal epitopic E-tag peptide, and ligated with T4 ligase. The plasmid was then transformed into Top 10 *E. coli* cells (Thermo Fisher Scientific, Waltham, MA) and plated on LB-Ampicillin plates. Two colonies were picked off the plate, grown in LB-Amp media, and their plasmids isolated. Plasmid DNA was sequenced to confirm the ligation and the expected VHH sequence. One correct clone was chosen for each VHH to be transformed for expression.

Once the sequence was confirmed, the plasmid prep was then transformed into Rosetta-gami 2(DE3)pLacI *E. coli* cells (EMD Millipore, Billerica, MA) with chloramphenicol resistance, and grown on LB-Amp-Chlor-2% glucose plates overnight. A single colony was then chosen and grown in LB-Amp-Chlor-2% glucose media overnight. The next morning, this growth was used to seed a subculture of 130 mL of LB-Amp-Chlor media. Once grown to log phase, VHH expression was induced with 1 mM IPTG, and the suspension was shaken at 15° C overnight. The bacteria were then lysed using Bug Buster plus Lysonase Kit (EMD Millipore, Billerica MA), HexaHis-tagged thioredoxin-VHH protein in the supernatant was purified with a Ni-NTA agarose (Thermo Fisher Scientific, Waltham, MA) column, and eluted with 250 mM imidazole. Purified VHH was then dialyzed in a 7000 MWCO Slide-A-Lyzer dialysis cassette (Thermo Fisher Scientific, Waltham, MA) against 4L PBS overnight, with at least one buffer

change. Dialyzed protein was then sterilized using a Whatman Puradisc 0.2 micron filter (Thermo Fisher Scientific, Waltham, MA). Protein purity was verified by SDS PAGE (**Fig. 1A**), and concentration was determined by absorbance at 280 nm using the calculated extinction coefficient for each thioredoxin-VHH construct.

**HX-MS analysis of RiVax with V<sub>H</sub>Hs.** JNM-C12 protection of RiVax peptides is shown in **Figure S7A** and is shown mapped onto the structure of RTA in **Figure 6A**. As described in the methods section, regions that are strongly and intermediately protected are defined as the epitope region. Based on protection, the JNM-C12 binds to residues 92-109 spanning helix B and a 3/10-helix on the C-terminal end of helix B and residues 108-122 spanning strand h. There was also some deprotection of residues 249-255 spanning a 3/10-helix and a  $\beta$ -bridge, possibly due to allosteric effects induced by JNM-C12.

JNM-D1 protection of RiVax peptides is shown in **Figure S7B** and mapped onto the structure of RTA in **Figure 6B**. Based on protection, the JNM-D1 binds to residues 130-135, spanning a 3/10-helix on the C-terminal end of helix C, residues 123-129, spanning helix C, and in residues 205-210, spanning helix G. Interestingly, this V<sub>H</sub>H induced strong deprotection (faster HX) in residues 249-255 that span a 3/10-helix and a  $\beta$ -bridge. This strong deprotection on the opposite side of RiVax might be due to allosteric effects induced by JNM-D1.

V1B11 protection of RiVax peptides is shown in **Figure S7C** and is shown mapped onto the structure of RTA in **Figure 6C**. Based on protection, V1B11 binds to residues 123-135, spanning helix C, residues 205-217, spanning helix G, and residues 247-255, spanning a 3/10-helix and a  $\beta$ -bridge,. The binding of V1B11 to residues 247-255 of RiVax is in contrast to the other two V<sub>H</sub>Hs, JNM-D1 and JNM-C12, where there is an increase in flexibility in residues 247-255. However, V1B11 and JNM-D1 share a similar epitope region on RiVax in residues 123-135, spanning helix C and residues 205-217, spanning helix G.

## Supplemental References

1. O'Hara JM, Neal LM, McCarthy EA, Kasten-Jolly JA, Brey RN, 3rd, Mantis NJ. Folding domains within the ricin toxin A subunit as targets of protective antibodies. *Vaccine*. 2010;28:7035-46. Epub 2010/08/24. doi: S0264-410X(10)01129-1 [pii] 10.1016/j.vaccine.2010.08.020. PubMed PMID: 20727394.

2. O'Hara JM, Kasten-Jolly JC, Reynolds CE, Mantis NJ. Localization of non-linear neutralizing B cell epitopes on ricin toxin's enzymatic subunit (RTA). *Immunol Lett.* 2014;158(1-2):7-13. doi: 10.1016/j.imlet.2013.11.009. PubMed PMID: 24269767; PubMed Central PMCID: PMC4070743.
3. Neal LM, O'Hara J, Brey RN, 3rd, Mantis NJ. A monoclonal immunoglobulin G antibody directed against an immunodominant linear epitope on the ricin A chain confers systemic and mucosal immunity to ricin. *Infect Immun.* 2010;78(1):552-61. Epub 2009/10/28. doi: 10.1128/IAI.00796-09. PubMed PMID: 19858297; PubMed Central PMCID: PMCPMC2798177.
4. McGuinness CR, Mantis NJ. Characterization of a novel high-affinity monoclonal immunoglobulin G antibody against the ricin B subunit. *Infect Immun.* 2006;74(6):3463-70. Epub 2006/05/23. doi: 10.1128/IAI.00324-06. PubMed PMID: 16714577; PubMed Central PMCID: PMCPMC1479246.
5. Yermakova A, Mantis NJ. Protective immunity to ricin toxin conferred by antibodies against the toxin's binding subunit (RTB). *Vaccine.* 2011;29(45):7925-35. Epub 2011/08/30. doi: S0264-410X(11)01334-X [pii] 10.1016/j.vaccine.2011.08.075. PubMed PMID: 21872634.
6. Yermakova A, Vance DJ, Mantis NJ. Sub-Domains of Ricin's B Subunit as Targets of Toxin Neutralizing and Non-Neutralizing Monoclonal Antibodies. *PLoS One.* 2012;7(9):e44317. Epub 2012/09/18. doi: 10.1371/journal.pone.0044317 PONE-D-12-14070 [pii]. PubMed PMID: 22984492; PubMed Central PMCID: PMC3439471.

## Supplementary Figure Legends

**Figure S1. RTA secondary structure.** RTA (PDB ID: 1RTC) is shown in green cartoon representation. Secondary structural elements are labeled.

**Figure S2. Vero cell cytotoxicity assays.** The 7 strong (legend, left, closed symbols) and 7 moderate (legend, right, open symbols) neutralizing V<sub>H</sub>Hs are shown. The horizontal dotted line at 50% cell viability intersects each curve at the IC<sub>50</sub> value for that V<sub>H</sub>H. The vertical dotted lines are at the borderlines between neutralizing categories. V<sub>H</sub>Hs with IC<sub>50</sub>s <10 nM are strong neutralizers, while those with IC<sub>50</sub>s between 10 and 100 nM are moderate neutralizers. The graph is zoomed in to concentrations between 100 pM and 1 μM to clearly show the delineation between strong and moderate neutralizers. Shown is a representative curve for each V<sub>H</sub>H, with each concentration tested in triplicate, and error bars representing the standard deviation. In some cases, the error bars are too small to be visible.

**Figure S3. Representative SPR binding curves.** Shown are representative SPR binding curves for the same five VHHs as in Figure 1. (A) V5B6; (B) V5D5; (C) V5E4; (D) V5G1; (E) V5H6.

**Figure S4. Alignment of ten published VHH:RTA co-crystal structures.** RTA (PDB ID: 1RTC) is shown in gray surface representation. All ten published VHH:RTA co-crystal structures (see Table 2 for PDB IDs) are aligned showing epitope clustering. With respect to the left image, Cluster I VHHs are shown on the top right (JIV-F5 (light purple), JIV-G12 (blue), JIY-A7 (yellow), JIY-E5 (brown), JIY-G11 (pink) and JNM-F8 (orange)). The yellow VHH on the top left is JIY-D10, which straddles Clusters I and II. The three VHHs on the left side, JIY-E1 (gray), V1C7 (pink), and V5E1 (green) represent Cluster II.

**Figure S5. Sandwich ELISA overestimates VHH epitopes.** Left: The same image that is shown in Figure 2C, the co-crystal structure of V1C7 (red) and RTA (gray) (PDB ID: 5J56), with its sandwich ELISA predicted epitope colored orange and purple. Right: The same image, rotated up 90 degrees. In this orientation, it's notable that the predicted epitope overestimates the surface area contacted by V1C7 in the crystal structure. This likely represents steric clashes between the VHH and the mAbs used in the sandwich ELISA.

**Figure S6. Heat map of anti-RTA VHHs bound to mAb captured ricin.** Anti-RTA VHHs are listed down the left side, while mAbs representing the various RTA epitope clusters are shown along the top. The surrogate receptor ASF is also included. All VHHs are normalized to the mAb-ricin complex to which it bound strongest.

**Figure S7.  $\Delta\overline{HX}$  plots of RiVax in the presence of respective V<sub>H</sub>Hs as measured by HX-MS.** (A) JNM-C12, (B) JNM-D1 and (C) V1B11. The x-axis is the peptide index. The residue ranges of the peptides are listed in **Table S5**. The  $\Delta\overline{HX}$  on the y-axis was calculated as described in methods and in more detail elsewhere (R. Toth et al., *manuscript in preparation*). The bars (peptides) are colored based on protection category: dark blue indicates strong protection, medium blue is intermediate protection, and yellow is strong deprotection. The dashed lines

represent a confidence interval set at three times the standard error of  $\Delta\overline{HX}$  for each peptide. Gaps in the confidence limit indicate that data for the corresponding peptides are not available.

**Figure S8. Heat map of anti-RTB VHHs bound to mAb captured ricin.** Anti-RTB VHHs are listed down the left side, while anti-RTB mAbs and mAbs representing RTA Cluster 2 are shown along the top. The surrogate receptor ASF is also included. All VHHs are normalized to the mAb-ricin complex to which it bound strongest.

## Supplementary Tables

| <b>Table S1. Non-Expressed V<sub>H</sub>Hs</b> |               |                |                                |                |
|------------------------------------------------|---------------|----------------|--------------------------------|----------------|
| <b>VHH</b>                                     | <b>Screen</b> | <b>Genbank</b> | <b>Specificity<sup>a</sup></b> | <b>Family</b>  |
| JNM-F2                                         | 3             | KY824624       | A                              | J1Y-D10        |
| JNM-F3                                         | 3             | KY824625       | A                              | JNM-A11        |
| JNM-G5                                         | 3             | KY824626       | A                              | JIV-F6         |
| JNN-A8                                         | 4             | KY824627       | B                              | JIZ-B7         |
| JNN-B10                                        | 4             | KY824628       | B                              | JIZ-B7         |
| V1A8                                           | 5             | KY824629       | A                              | J1Y-D9         |
| V1A12                                          | 5             | KY824630       | A                              | JNM-B5         |
| V2F11                                          | 6             | KY824631       | A                              | JIV-F6         |
| V4C1                                           | 8             | KY824632       | B                              | V4C6           |
| V4C7                                           | 8             | KY824633       | B                              | V2C11          |
| V4E3                                           | 8             | KY824634       | B                              | V2C11          |
| V4H5                                           | 8             | KY824635       | B                              | JIZ-B7         |
| V5F4                                           | 9             | KY824636       | A                              | - <sup>b</sup> |
| V5G9                                           | 9             | KY824637       | B                              | V4A1           |

<sup>a</sup>, A=RTA, B=RTB; <sup>b</sup>, V5F4 is a unique sequence and does not belong to a sequence family; V<sub>H</sub>H expression in *E. coli* failed.



**Table S2. V<sub>H</sub>H Binding Kinetics to Ricin<sup>a</sup>**

| V <sub>H</sub> H | k <sub>a</sub> (M <sup>-1</sup> s <sup>-1</sup> ) | k <sub>d</sub> (s <sup>-1</sup> ) | K <sub>D</sub> (M) |
|------------------|---------------------------------------------------|-----------------------------------|--------------------|
| JIV-F5           | 5.44E+05                                          | 1.05E-05                          | 1.93E-11           |
| JIV-F6           | 1.94E+05                                          | 3.61E-04                          | 1.86E-09           |
| JIV-G12          | 9.30E+05                                          | 1.20E-04                          | 1.29E-10           |
| JIY-A7           | 1.50E+05                                          | 6.50E-04                          | 4.33E-09           |
| JIY-D9           | 3.06E+05                                          | 5.31E-05                          | 1.74E-10           |
| JIY-D10          | 4.40E+05                                          | 5.00E-05                          | 1.14E-10           |
| JIY-E1           | 3.50E+05                                          | 2.40E-04                          | 6.86E-10           |
| JIY-E3           | 9.53E+05                                          | 2.82E-04                          | 2.96E-10           |
| JIY-E5           | 1.10E+05                                          | 2.10E-05                          | 1.91E-10           |
| JIY-G11          | 1.50E+05                                          | 8.30E-05                          | 5.53E-10           |
| JIZ-B7           | 3.06E+05                                          | 9.35E-06                          | 3.06E-11           |
| JNM-A11          | 4.45E+05                                          | 8.92E-05                          | 2.00E-10           |
| JNM-B5           | 4.70E+05                                          | 2.82E-05                          | 6.00E-11           |
| JNM-C12          | 5.07E+05                                          | 5.01E-05                          | 9.88E-11           |
| JNM-D1           | 1.80E+05                                          | 2.15E-04                          | 1.19E-09           |
| JNM-E4           | 2.88E+05                                          | 2.40E-05                          | 8.33E-11           |
| JNM-F8           | 9.37E+05                                          | 1.90E-04                          | 2.03E-10           |
| JNM-G4           | 1.23E+06                                          | 1.57E-04                          | 1.28E-10           |
| V1B4             | 6.55E+04                                          | 2.68E-04                          | 4.09E-09           |
| V1B10            | 8.29E+04                                          | 7.60E-05                          | 9.17E-10           |
| V1B11            | 2.76E+04                                          | 2.44E-04                          | 8.84E-09           |
| V1C7             | 9.10E+04                                          | 2.90E-04                          | 3.19E-09           |
| V1D3             | 3.15E+05                                          | 1.45E-04                          | 4.60E-10           |
| V1G6             | 3.05E+04                                          | 1.63E-04                          | 5.34E-09           |
| V2A11            | 2.97E+04                                          | 5.41E-05                          | 1.82E-09           |
| V2B8             | 1.96E+04                                          | 6.36E-04                          | 3.24E-08           |
| V2B9             | 1.47E+05                                          | 1.51E-04                          | 1.03E-09           |
| V2C11            | 3.45E+05                                          | 5.32E-06                          | 1.54E-11           |
| V2D4             | 2.75E+04                                          | 8.79E-05                          | 3.20E-09           |
| V2E8             | 5.09E+04                                          | 2.92E-04                          | 5.74E-09           |
| V2G10            | 8.48E+04                                          | 9.84E-05                          | 1.16E-09           |
| V4A1             | 2.49E+05                                          | 1.66E-04                          | 6.67E-10           |
| V5A2             | 2.15E+05                                          | 3.14E-04                          | 1.46E-09           |
| V5B1             | 1.38E+05                                          | 2.99E-04                          | 2.17E-09           |
| V5B6             | 1.76E+05                                          | 1.17E-04                          | 6.68E-10           |
| V5C1             | 6.37E+05                                          | 1.92E-04                          | 3.01E-10           |
| V5C4             | 3.85E+04                                          | 1.93E-04                          | 5.01E-09           |
| V5D1             | 4.25E+05                                          | 9.20E-05                          | 2.16E-10           |
| V5D5             | 5.91E+04                                          | 3.27E-04                          | 5.54E-09           |

|       |          |          |          |
|-------|----------|----------|----------|
| V5E1  | 2.17E+05 | 4.14E-06 | 1.91E-11 |
| V5E4  | 4.82E+05 | 2.90E-06 | 6.01E-12 |
| V5G1  | 1.89E+05 | 2.00E-05 | 1.06E-10 |
| V5G6  | 1.98E+05 | 2.45E-04 | 1.24E-09 |
| V5G12 | 1.64E+05 | 1.63E-04 | 9.94E-10 |
| V5H2  | 1.82E+05 | 3.96E-04 | 2.18E-09 |
| V5H6  | 3.00E+04 | 6.96E-04 | 2.32E-08 |

---

<sup>a</sup>, Binding kinetics were determined by SPR, as described in the Materials and Methods.

---

**Table S3. RTA-specific mouse mAbs**

| <b>mAb</b> | <b>Cluster</b> | <b>Ref.</b> |
|------------|----------------|-------------|
| PB10       | I              | [1]         |
| WECB2      |                | [2]         |
| SWB1       | I-II           | unpublished |
| SyH7       | II             | [1]         |
| PA1        |                | [2]         |
| TB12       |                | [2]         |
| PH12       |                | [2]         |
| IB2        | III            | [2]         |
| GD12       | IV             | [3]         |

---

**Table S4. RTB-specific mouse mAbs**

---

| <b>mAb</b> | <b>Ref.</b> |
|------------|-------------|
| 24B11      | [4]         |
| SyIH3      | [5]         |
| JB11       | [5]         |
| JB4        | [6]         |
| BJF9       | [6]         |

---

**Table S5.** RiVax peptic peptides

| Amino acid residue # |       |     |
|----------------------|-------|-----|----------------------|-------|-----|----------------------|-------|-----|----------------------|-------|-----|
| Pep #                | start | end |
| <b>1</b>             | 1     | 11  | <b>36</b>            | 92    | 103 | <b>71</b>            | 162   | 168 | <b>106</b>           | 217   | 232 |
| <b>2</b>             | 12    | 20  | <b>37</b>            | 92    | 107 | <b>72</b>            | 165   | 168 | <b>107</b>           | 217   | 240 |
| <b>3</b>             | 12    | 24  | <b>38</b>            | 93    | 99  | <b>73</b>            | 165   | 171 | <b>108</b>           | 218   | 225 |
| <b>4</b>             | 21    | 24  | <b>39</b>            | 93    | 107 | <b>74</b>            | 168   | 171 | <b>109</b>           | 218   | 232 |
| <b>5</b>             | 25    | 32  | <b>40</b>            | 102   | 107 | <b>75</b>            | 169   | 173 | <b>110</b>           | 220   | 232 |
| <b>6</b>             | 25    | 37  | <b>41</b>            | 103   | 107 | <b>76</b>            | 172   | 181 | <b>111</b>           | 221   | 232 |
| <b>7</b>             | 28    | 37  | <b>42</b>            | 104   | 107 | <b>77</b>            | 175   | 181 | <b>112</b>           | 226   | 232 |
| <b>8</b>             | 33    | 59  | <b>43</b>            | 104   | 109 | <b>78</b>            | 178   | 181 | <b>113</b>           | 226   | 240 |
| <b>9</b>             | 37    | 59  | <b>44</b>            | 108   | 117 | <b>79</b>            | 182   | 186 | <b>114</b>           | 227   | 240 |
| <b>10</b>            | 38    | 45  | <b>45</b>            | 108   | 118 | <b>80</b>            | 182   | 187 | <b>115</b>           | 232   | 240 |
| <b>11</b>            | 38    | 55  | <b>46</b>            | 108   | 122 | <b>81</b>            | 182   | 188 | <b>116</b>           | 232   | 243 |
| <b>12</b>            | 38    | 57  | <b>47</b>            | 118   | 122 | <b>82</b>            | 182   | 190 | <b>117</b>           | 232   | 248 |
| <b>13</b>            | 38    | 59  | <b>48</b>            | 119   | 126 | <b>83</b>            | 182   | 204 | <b>118</b>           | 233   | 243 |
| <b>14</b>            | 56    | 59  | <b>49</b>            | 123   | 126 | <b>84</b>            | 187   | 204 | <b>119</b>           | 233   | 244 |
| <b>15</b>            | 58    | 61  | <b>50</b>            | 123   | 129 | <b>85</b>            | 188   | 204 | <b>120</b>           | 233   | 246 |
| <b>16</b>            | 58    | 68  | <b>51</b>            | 123   | 133 | <b>86</b>            | 189   | 204 | <b>121</b>           | 233   | 248 |
| <b>17</b>            | 60    | 68  | <b>52</b>            | 123   | 135 | <b>87</b>            | 189   | 206 | <b>122</b>           | 240   | 243 |
| <b>18</b>            | 60    | 69  | <b>53</b>            | 127   | 133 | <b>88</b>            | 191   | 204 | <b>123</b>           | 241   | 244 |
| <b>19</b>            | 62    | 68  | <b>54</b>            | 127   | 135 | <b>89</b>            | 191   | 207 | <b>124</b>           | 241   | 246 |
| <b>20</b>            | 69    | 72  | <b>55</b>            | 130   | 135 | <b>90</b>            | 195   | 204 | <b>125</b>           | 241   | 248 |
| <b>21</b>            | 69    | 73  | <b>56</b>            | 130   | 151 | <b>91</b>            | 205   | 210 | <b>126</b>           | 243   | 248 |
| <b>22</b>            | 69    | 74  | <b>57</b>            | 133   | 144 | <b>92</b>            | 205   | 214 | <b>127</b>           | 244   | 248 |
| <b>23</b>            | 70    | 74  | <b>58</b>            | 134   | 146 | <b>93</b>            | 205   | 216 | <b>128</b>           | 245   | 248 |
| <b>24</b>            | 72    | 79  | <b>59</b>            | 134   | 151 | <b>94</b>            | 205   | 217 | <b>129</b>           | 247   | 253 |
| <b>25</b>            | 72    | 91  | <b>60</b>            | 136   | 146 | <b>95</b>            | 207   | 214 | <b>130</b>           | 247   | 254 |
| <b>26</b>            | 73    | 79  | <b>61</b>            | 136   | 147 | <b>96</b>            | 207   | 216 | <b>131</b>           | 247   | 255 |
| <b>27</b>            | 73    | 91  | <b>62</b>            | 136   | 151 | <b>97</b>            | 207   | 217 | <b>132</b>           | 249   | 253 |
| <b>28</b>            | 75    | 79  | <b>63</b>            | 146   | 150 | <b>98</b>            | 208   | 214 | <b>133</b>           | 249   | 254 |
| <b>29</b>            | 75    | 91  | <b>64</b>            | 147   | 150 | <b>99</b>            | 208   | 216 | <b>134</b>           | 249   | 255 |
| <b>30</b>            | 80    | 91  | <b>65</b>            | 147   | 151 | <b>100</b>           | 208   | 217 | <b>135</b>           | 255   | 267 |
| <b>31</b>            | 80    | 92  | <b>66</b>            | 148   | 151 | <b>101</b>           | 211   | 216 | <b>136</b>           | 256   | 267 |
| <b>32</b>            | 84    | 91  | <b>67</b>            | 152   | 161 | <b>102</b>           | 211   | 217 | <b>137</b>           | 257   | 267 |
| <b>33</b>            | 92    | 99  | <b>68</b>            | 152   | 164 | <b>103</b>           | 212   | 216 | <b>138</b>           | 258   | 267 |
| <b>34</b>            | 92    | 101 | <b>69</b>            | 153   | 164 | <b>104</b>           | 217   | 220 |                      |       |     |
| <b>35</b>            | 92    | 102 | <b>70</b>            | 162   | 167 | <b>105</b>           | 217   | 225 |                      |       |     |

Figure S1

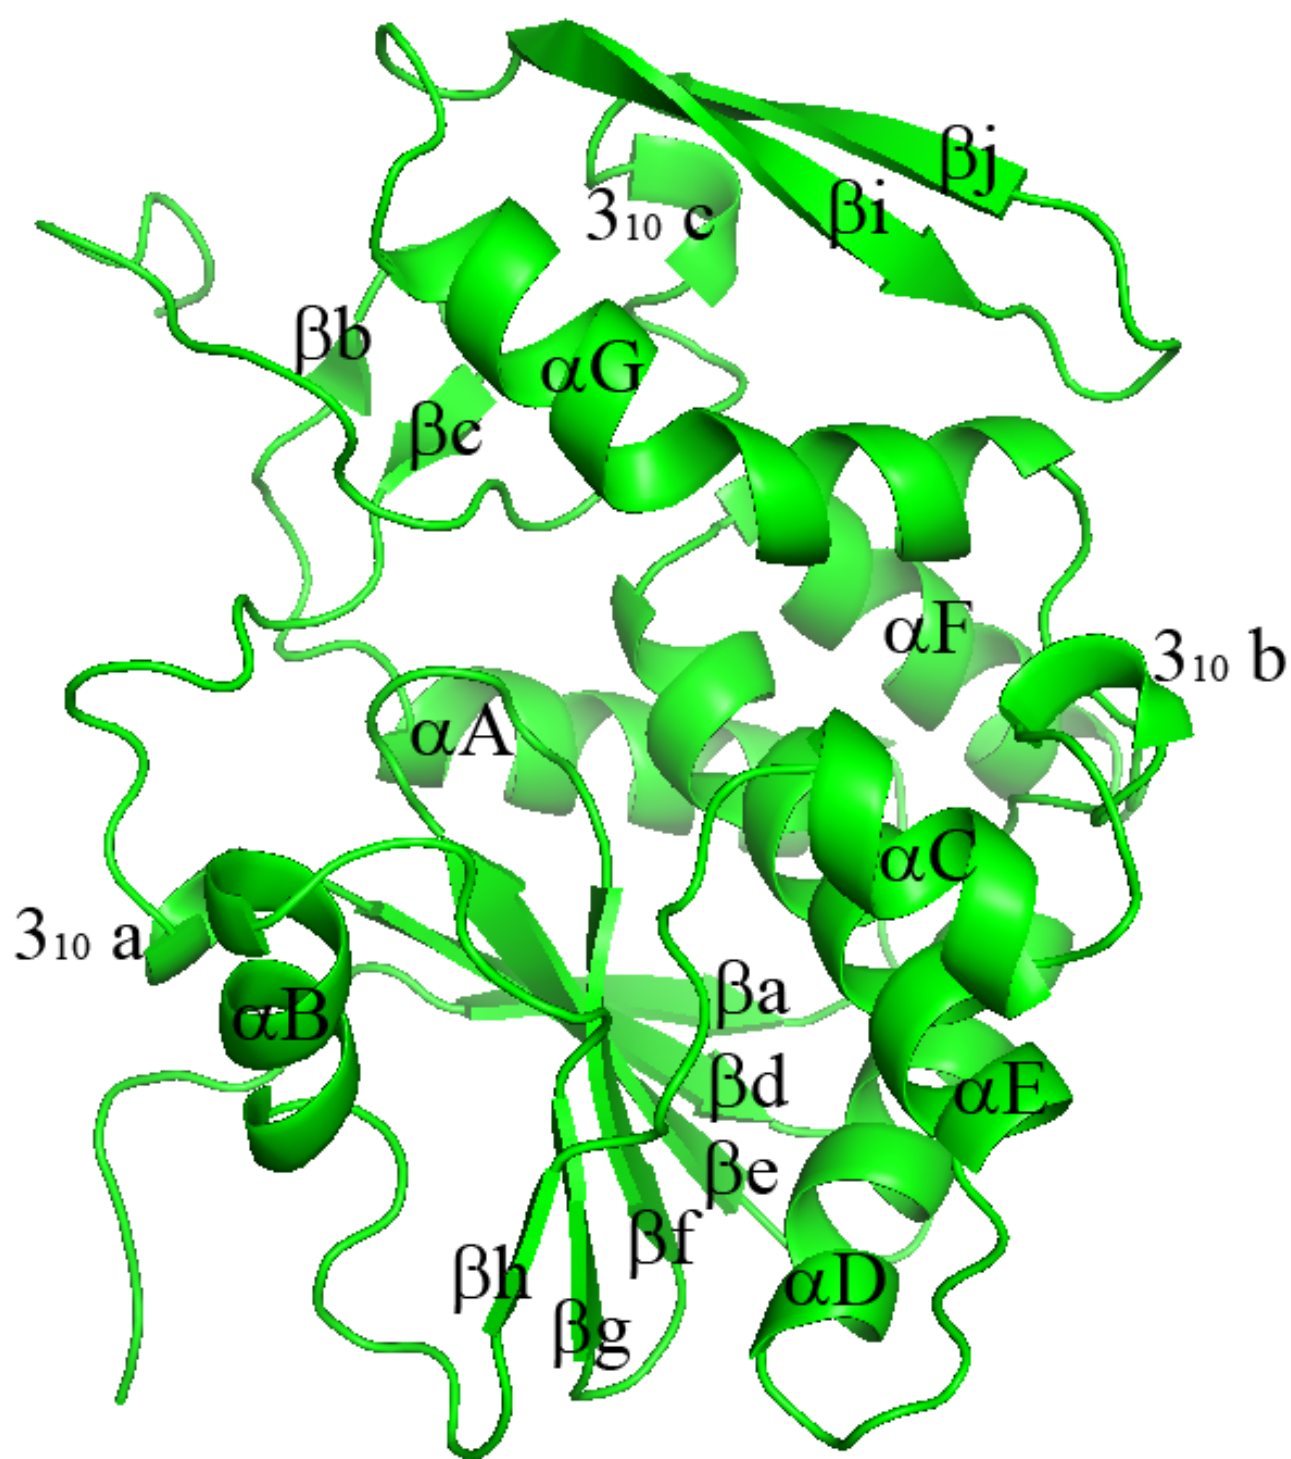



**A. V5B6**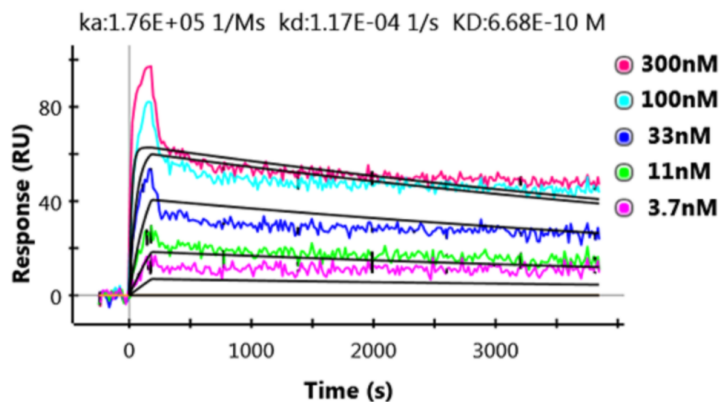**B. V5D5**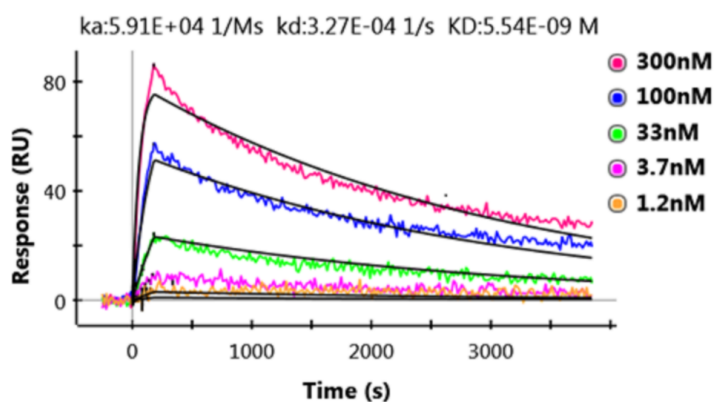**C. V5E4**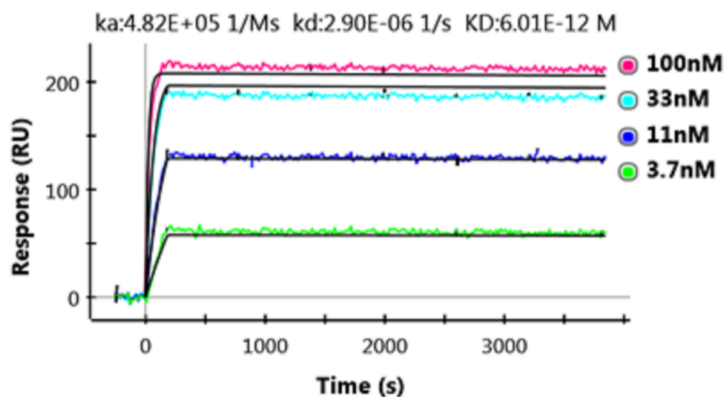**D. V5G1**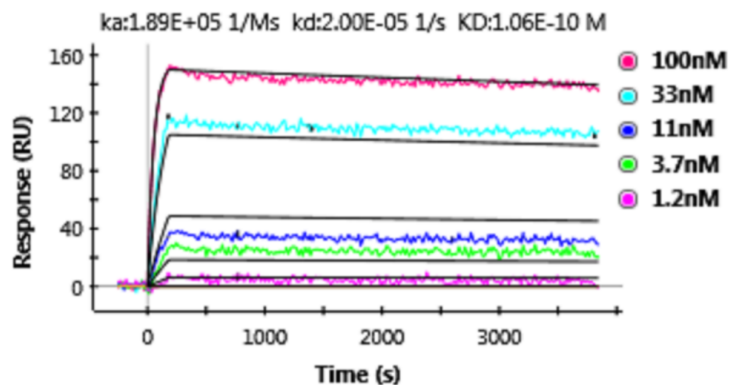**E. V5H6**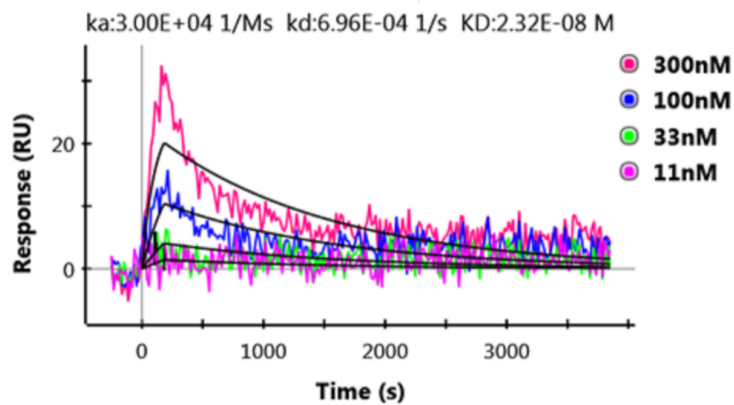



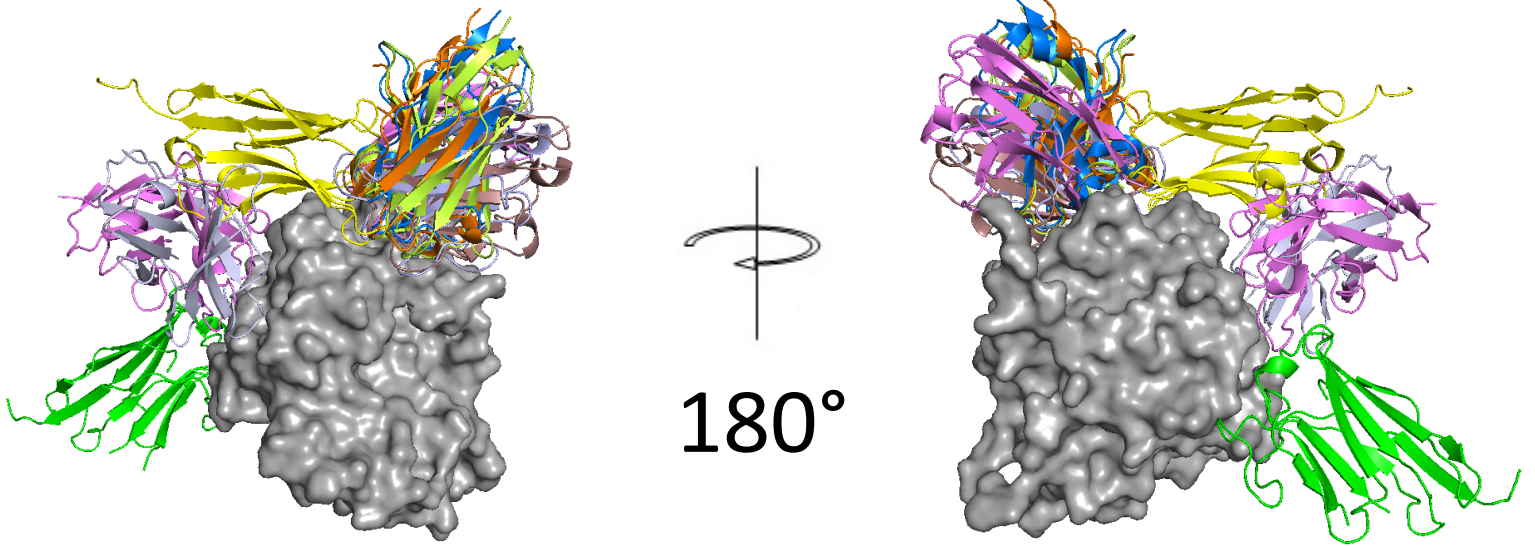

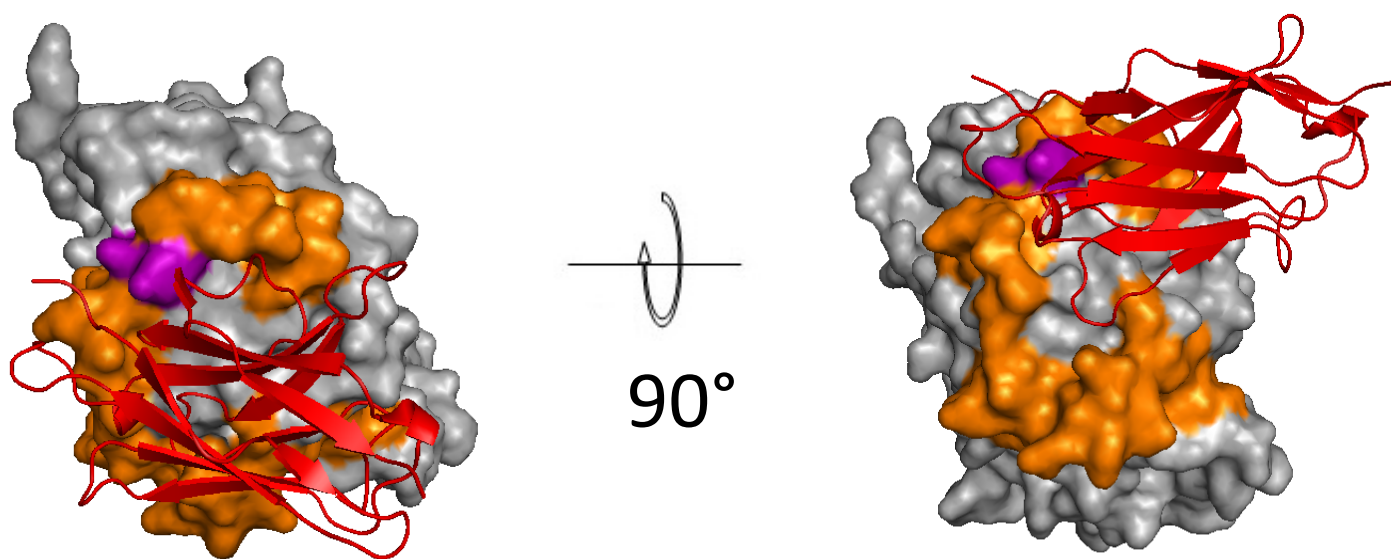

Figure S6

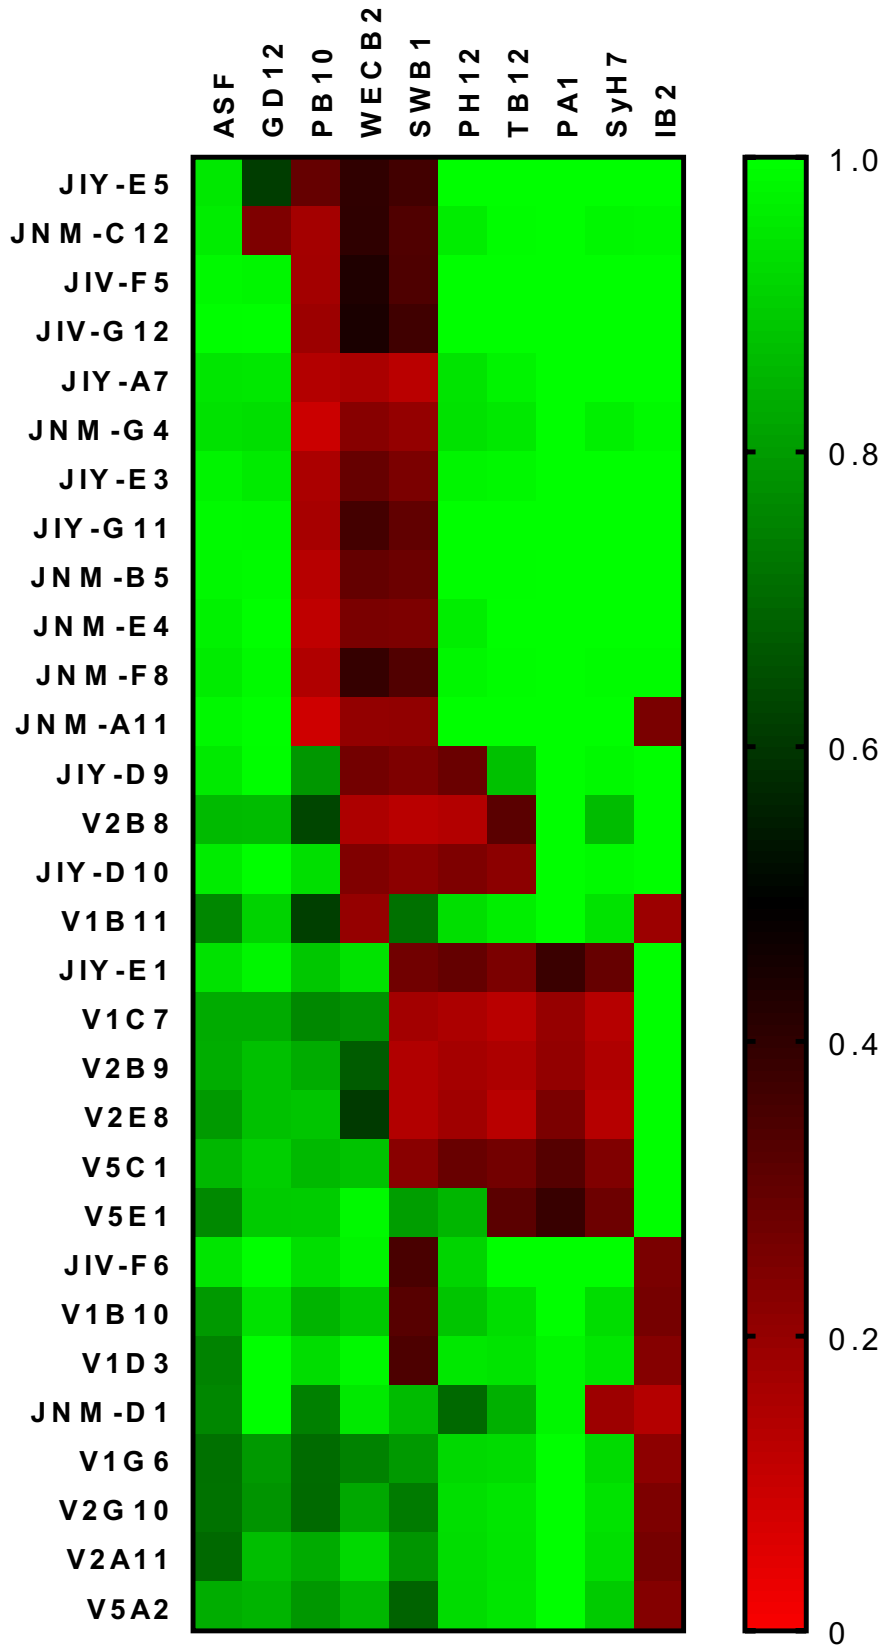

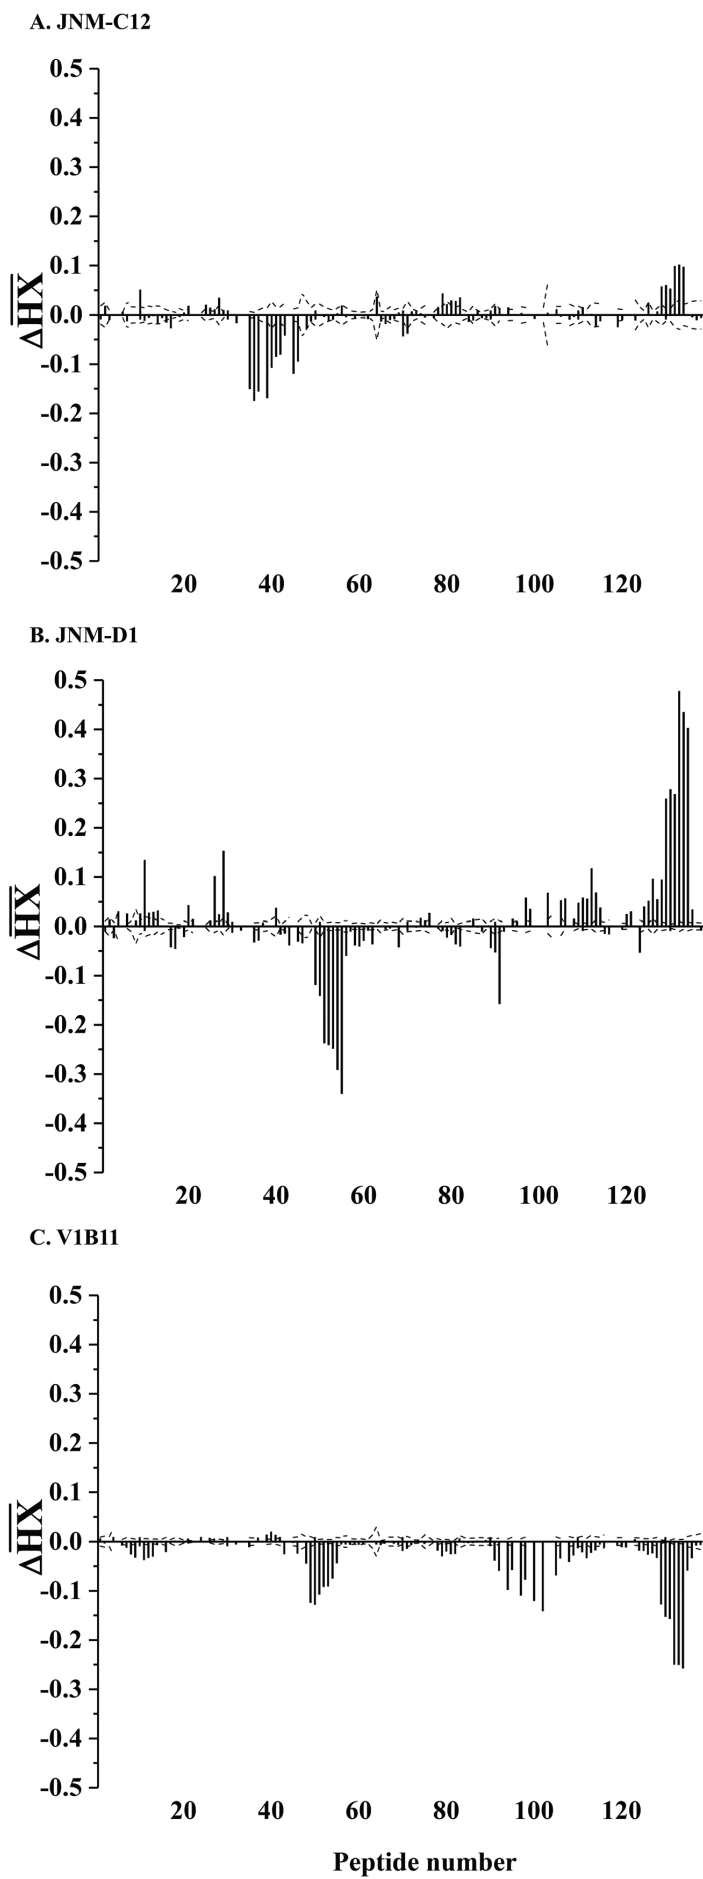

Supplement: CVI.00236-17_zcd012175549s1.pdf [file CVI.00236-17_zcd012175549s1.pdf]
